# Supplementary material for: Geographic disparities, determinants, and temporal changes in the prevalence of pre-diabetes in Florida
Source: PeerJ. 2021 Jan 13;9:e10443. doi: 10.7717/peerj.10443 (PMC7811289; doi:10.7717/peerj.10443)
Supplement: Supplemental Information 1 [file peerj-09-10443-s001.xlsx]

## Sheet: Sheet1
CountyName	arth_pro16	inact_pro16	unins_pro16	Pop16over_16	Pop16over_13	MedHHinc10k13	Nonhispbl13	arth_pro13	inact_pro13	unins_pro13	nonhispbl16	unemploy16	unemploy13	NCHS_class	meantrav	walkbike	over60com	Ov_Ob	Obes_pro	disab_pro	LIMACC	poverty	educ_nohs	Hispanic	PropMale	PCP1k	Medhhinc10k_16	prediab_std	agestdpre13
Alachua	0.190968	0.259862	0.107998	215536	210078	4.2149	0.18208	0.216076	0.292481	0.196471	0.182271	0.07	0.086	3	21	0.058	0.031	0.54806	0.227445	0.222619	0.06	0.189013	0.0489596	0.0887694	0.477223	2.07593	4.4702	0.0990913	0.110119
Baker	0.390499	0.371597	0.139838	21374	20891	4.9236	0.149777	0.342781	0.511489	0.261334	0.143399	0.068	0.114	2	30	0.009	0.108	0.685352	0.436554	0.254879	0.13	0.11762	0.139428	0.0257322	0.439766	0.35795	5.3327	0.168676	0.143066
Bay	0.294572	0.357779	0.166189	144097	137875	4.7461	0.0990245	0.312479	0.395282	0.231797	0.102355	0.075	0.099	4	23	0.022	0.049	0.656124	0.306789	0.27748	0.11	0.106387	0.0958753	0.0501676	0.492992	0.54356	4.8577	0.0835906	0.07102
Bradford	0.158321	0.268083	0.213987	22192	23132	4.0259	0.20249	0.32646	0.426483	0.207699	0.195656	0.106	0.157	6	33	0.031	0.183	0.698652	0.320657	0.284769	0.02	0.1104	0.1949	0.0407354	0.539138	0.33425	4.3373	0.0491628	0.100614
Brevard	0.324879	0.299631	0.148936	469099	454123	4.8039	0.092563	0.284313	0.305174	0.224037	0.094771	0.093	0.124	3	24	0.019	0.059	0.61288	0.246465	0.272756	0.12	0.0924027	0.0678071	0.0826883	0.481359	0.75113	4.9914	0.0936518	0.0795894
Broward	0.198636	0.239454	0.146881	1508322	1437782	5.1251	0.252631	0.204757	0.361067	0.227813	0.26383	0.087	0.119	2	28	0.019	0.083	0.648891	0.268461	0.202157	0.02	0.0953079	0.0878398	0.268398	0.479583	0.79282	5.2954	0.11905	0.0911868
Calhoun	0.2511	0.422758	0.149717	11851	11909	3.278	0.144848	0.295785	0.394358	0.233609	0.13695	0.101	0.102	6	28	0.011	0.12	0.66518	0.358439	0.25396	0.09	0.0886845	0.204532	0.0572947	0.59595	0.48534	3.7089	0.201648	0.0988955
Charlotte	0.317761	0.267548	0.144941	150087	141882	4.4378	0.053615	0.361692	0.31691	0.179453	0.0551414	0.101	0.137	4	24	0.022	0.064	0.672224	0.27299	0.189754	0.14	0.0771219	0.0936968	0.0570536	0.483033	0.64438	4.4865	0.146212	0.0825323
Citrus	0.383345	0.325565	0.154383	122081	121243	3.91	0.0271686	0.418413	0.38493	0.231475	0.0281534	0.116	0.158	4	26	0.016	0.079	0.637381	0.236044	0.312289	0.13	0.109632	0.104265	0.0456418	0.479969	0.57095	3.9054	0.104377	0.0860362
Clay	0.290476	0.25128	0.147384	157662	149894	5.9482	0.0936662	0.242169	0.315325	0.149146	0.0964405	0.089	0.113	2	33	0.01	0.133	0.663398	0.302762	0.259163	0.07	0.0771016	0.0730412	0.0822265	0.494616	0.67207	5.9179	0.108145	0.106933
Collier	0.28361	0.241687	0.178085	292060	272930	5.5843	0.0584326	0.269713	0.318732	0.256749	0.0613744	0.064	0.101	3	24	0.027	0.055	0.569368	0.225401	0.146312	0.09	0.0786448	0.155332	0.229823	0.487722	0.74219	5.9783	0.117554	0.0588619
Columbia	0.294613	0.378837	0.188878	54974	54220	3.807	0.169698	0.314603	0.319005	0.185451	0.174173	0.117	0.188	5	24	0.014	0.071	0.715881	0.392622	0.281435	0.07	0.123331	0.113302	0.0504966	0.521935	0.46177	4.2848	0.113557	0.101492
DeSoto	0.202238	0.456862	0.345833	28767	28010	3.4963	0.130382	0.312557	0.480504	0.28436	0.129732	0.083	0.126	5	25	0.03	0.113	0.676732	0.288514	0.211492	0.06	0.204436	0.288318	0.271353	0.615514	0.22346	3.5513	0.0446822	0.0639845
Dixie	0.294924	0.572233	0.18289	13394	13345	3.3981	0.0852004	0.423033	0.35101	0.245963	0.0760788	0.053	0.09	6	28	0.011	0.156	0.657568	0.366954	0.265835	0.04	0.136852	0.190492	0.0375541	0.494944	0.06135	3.4634	0.143324	0.127653
Duval	0.237463	0.278048	0.150591	716177	691293	4.8323	0.276048	0.254296	0.357799	0.200885	0.276753	0.086	0.117	1	24	0.021	0.043	0.650776	0.302033	0.233938	0.09	0.112992	0.0895005	0.07894	0.476913	0.98677	4.9196	0.138459	0.102715
Escambia	0.259521	0.298396	0.159136	251926	244094	4.3918	0.205019	0.268197	0.373178	0.212093	0.205283	0.083	0.12	3	22	0.025	0.04	0.628384	0.265643	0.239007	0.12	0.0919834	0.0756036	0.049844	0.496417	0.72973	4.6117	0.099563	0.0908562
Flagler	0.320861	0.26792	0.122543	86639	80853	4.7233	0.103818	0.288436	0.27512	0.122377	0.103902	0.076	0.124	3	26	0.009	0.08	0.657697	0.29504	0.166846	0.13	0.0826879	0.066765	0.0885283	0.473744	0.49857	4.8898	0.101572	0.0724421
Franklin	0.262831	0.373441	0.170339	9915	9832	3.8328	0.161208	0.317934	0.348863	0.337058	0.147352	0.092	0.12	6	20	0.036	0.072	0.731105	0.434668	0.321698	0.01	0.115381	0.190339	0.0503278	0.638968	0.25208	4.0301	0.072961	0.160152
Gadsden	0.288051	0.306016	0.172495	36767	37135	3.538	0.535694	0.293602	0.420421	0.278592	0.535725	0.096	0.141	3	29	0.011	0.076	0.803747	0.457284	0.231063	0.06	0.158376	0.175894	0.0812413	0.522726	0.15215	3.8533	0.14457	0.117557
Gilchrist	0.267173	0.407377	0.141078	14092	13869	3.8406	0.0604225	0.370725	0.485575	0.198336	0.0680528	0.097	0.165	3	31	0.017	0.111	0.771817	0.300372	0.266223	0	0.143202	0.128108	0.0481834	0.607342	0.34859	4.0881	0.158292	0.107745
Glades	0.462774	0.365094	0.153858	11310	10878	3.4694	0.134216	0.478394	0.506581	0.148857	0.128736	0.133	0.158	6	23	0.056	0.093	0.780406	0.401244	0.224975	0.31	0.107692	0.221522	0.177807	0.442941	0.07158	3.4143	0.123505	0.0449216
Gulf	0.292856	0.31085	0.20305	13739	13581	4.0455	0.203225	0.288015	0.36575	0.287008	0.201907	0.092	0.119	4	22	0.016	0.068	0.64452	0.266927	0.249375	0.07	0.0853774	0.140065	0.0476017	0.544036	0.43777	4.0822	0.169784	0.0595358
Hamilton	0.296605	0.485311	0.217509	11961	12123	3.7716	0.344799	0.279138	0.375335	0.305521	0.346794	0.14	0.163	6	20	0.016	0.02	0.661646	0.338857	0.22059	0.11	0.118385	0.215493	0.0763314	0.574231	0.2089	3.898	0.100414	0.100025
Hardee	0.186303	0.394676	0.300963	20777	20726	3.7125	0.0800926	0.206129	0.457489	0.32219	0.0748424	0.113	0.139	5	25	0.038	0.087	0.785133	0.397423	0.191097	0.22	0.151899	0.287239	0.38095	0.5015	0.1462	3.6222	0.103548	0.109206
Hendry	0.266242	0.371371	0.259101	28881	28642	3.5425	0.129006	0.38617	0.376437	0.376907	0.122676	0.101	0.154	5	29	0.03	0.163	0.706965	0.32192	0.136881	0.15	0.186455	0.326481	0.479	0.541245	0.38178	3.7552	0.0483625	0.122941
Hernando	0.282	0.322036	0.164245	147568	143511	4.1024	0.0467839	0.420062	0.292117	0.123632	0.047246	0.112	0.172	2	29	0.014	0.142	0.690639	0.355985	0.24079	0.14	0.100333	0.101327	0.104101	0.474146	0.68368	4.2274	0.0982792	0.0770432
Highlands	0.318213	0.36116	0.176536	83380	82436	3.556	0.0820879	0.337087	0.381228	0.171273	0.0903334	0.123	0.152	4	20	0.021	0.054	0.670586	0.327366	0.253815	0.14	0.115627	0.155775	0.158671	0.480409	0.654	3.5865	0.0875911	0.0700321
Hillsborough	0.219567	0.277242	0.157125	1050648	995811	4.9596	0.158281	0.226729	0.389743	0.194216	0.156259	0.079	0.11	1	27	0.024	0.069	0.625175	0.254087	0.198237	0.07	0.114313	0.0959815	0.248385	0.479581	0.93806	5.1681	0.0943	0.0804015
Holmes	0.307767	0.389624	0.165396	16013	16297	3.5511	0.0641222	0.317099	0.418944	0.267514	0.0799975	0.131	0.111	6	29	0.011	0.135	0.674133	0.344019	0.233339	0.09	0.155249	0.171808	0.0172984	0.542461	0.35921	3.7437	0.0924426	0.0502854
Indian River	0.32707	0.29616	0.139849	122794	116937	4.4772	0.0795557	0.343969	0.345846	0.21855	0.0809812	0.103	0.147	4	22	0.012	0.056	0.673673	0.327195	0.236424	0.14	0.0888561	0.122999	0.0986937	0.509218	0.68618	4.7446	0.131462	0.0781365
Jackson	0.295045	0.426184	0.199765	40765	40953	3.6809	0.263204	0.277688	0.432004	0.20982	0.266331	0.123	0.129	6	22	0.012	0.052	0.621111	0.333932	0.322444	0.02	0.12447	0.174678	0.0451122	0.564424	0.43542	3.547	0.119408	0.0852616
Jefferson	0.319976	0.243859	0.195616	12007	12217	4.417	0.350168	0.303574	0.358136	0.197966	0.344965	0.084	0.149	3	29	0.013	0.053	0.729736	0.415344	0.22465	0.07	0.086283	0.166551	0.0411427	0.465498	0.28765	4.1696	0.14096	0.116062
Lafayette	0.281355	0.369991	0.172586	7230	7135	3.9722	0.151787	0.390265	0.315982	0.137083	0.19101	0.15	0.112	6	25	0.013	0.088	0.690565	0.314854	0.235905	0.03	0.0988935	0.214784	0.115906	0.503789	0.11605	3.6236	0.0779368	0.0948013
Lake	0.337189	0.28477	0.17198	261270	246570	4.5035	0.0886929	0.325448	0.347554	0.204279	0.0911356	0.082	0.12	2	28	0.012	0.09	0.657594	0.323427	0.217219	0.11	0.0834501	0.110065	0.119543	0.47779	0.74241	4.7141	0.12144	0.111624
Lee	0.31307	0.276538	0.145933	568230	525549	4.7439	0.0721056	0.314221	0.316786	0.250044	0.0741795	0.085	0.135	3	27	0.018	0.071	0.644336	0.259849	0.206115	0.1	0.0979181	0.123898	0.168138	0.485295	0.64098	5.039	0.0879459	0.07471
Leon	0.198339	0.23151	0.100065	237300	230998	4.6369	0.290093	0.168107	0.270298	0.16207	0.297417	0.096	0.112	3	21	0.029	0.03	0.617797	0.286115	0.179906	0.08	0.171597	0.0491441	0.0597429	0.468769	1.11875	4.8248	0.126165	0.0820841
Levy	0.328055	0.36172	0.177118	32450	32909	3.4348	0.0887599	0.368187	0.35434	0.242777	0.0866564	0.099	0.148	6	30	0.019	0.098	0.670643	0.31317	0.34156	0.04	0.137874	0.152361	0.0679199	0.486266	0.17517	3.548	0.10519	0.0768822
Liberty	0.266125	0.432578	0.217709	6895	6798	3.9681	0.197852	0.27783	0.333174	0.256557	0.197389	0.091	0.206	6	33	0.01	0.163	0.740761	0.430315	0.312287	0.09	0.103408	0.167329	0.0565627	0.625011	0	3.7917	0.0858896	0.0896346
Madison	0.237666	0.308956	0.181552	15276	15570	3.3833	0.377007	0.281811	0.371567	0.201479	0.381186	0.124	0.142	6	26	0.036	0.122	0.625488	0.328846	0.168463	0.1	0.164114	0.142961	0.0462817	0.532643	0.10975	2.9806	0.147537	0.0850941
Manatee	0.30696	0.291005	0.119167	292762	270493	4.7876	0.0777543	0.312501	0.293321	0.216575	0.0785211	0.075	0.113	3	25	0.019	0.055	0.641357	0.253814	0.250395	0.06	0.0890314	0.110448	0.12696	0.477197	0.564	5.1483	0.0533349	0.0617438
Marion	0.32	0.386373	0.159016	284009	277618	3.9453	0.114676	0.308953	0.351764	0.214845	0.116979	0.101	0.138	3	25	0.017	0.063	0.65744	0.302952	0.286162	0.1	0.111285	0.116104	0.104134	0.473094	0.6332	4.0295	0.137772	0.0750518
Martin	0.243247	0.211078	0.133814	131100	125371	4.9846	0.0521253	0.281575	0.313928	0.140869	0.0523494	0.084	0.128	3	26	0.025	0.078	0.5195	0.143293	0.209279	0.08	0.0737757	0.101205	0.103921	0.490997	0.64272	5.2622	0.0705842	0.0435833
Miami-Dade	0.160082	0.363349	0.232533	2178775	2066991	4.31	0.178686	0.194948	0.42466	0.32419	0.175362	0.085	0.118	1	31	0.028	0.113	0.648716	0.258112	0.127297	0.02	0.126397	0.125953	0.673087	0.479326	0.96205	4.4224	0.0860483	0.0505754
Monroe	0.269802	0.304021	0.271333	67001	64428	5.3607	0.0602067	0.255282	0.308998	0.260522	0.0648199	0.049	0.075	5	18	0.111	0.044	0.541497	0.247653	0.181647	0.08	0.0894763	0.0728467	0.205758	0.522557	0.7714	6.0303	0.0618639	0.0956586
Nassau	0.289576	0.293373	0.105392	63450	60278	5.5315	0.0656127	0.328206	0.273445	0.147918	0.0635619	0.076	0.101	2	29	0.026	0.089	0.661757	0.320059	0.278413	0.07	0.085595	0.070299	0.0333806	0.530949	0.45893	5.9196	0.0729153	0.0698986
Okaloosa	0.231512	0.326214	0.157023	156589	149158	5.4684	0.0912656	0.296392	0.337013	0.172227	0.0951152	0.065	0.088	4	23	0.023	0.054	0.654687	0.284501	0.234888	0.1	0.0787348	0.0734931	0.0723997	0.504142	0.86991	5.7655	0.0972534	0.0988694
Okeechobee	0.347922	0.357737	0.195371	31751	31518	3.457	0.0895996	0.302094	0.430213	0.381087	0.0873043	0.112	0.159	5	25	0.036	0.118	0.664305	0.269938	0.313721	0.29	0.152531	0.251269	0.217883	0.422885	0.49611	3.6415	0.10587	0.0600861
Orange	0.168873	0.267193	0.195257	1002034	934112	4.7581	0.193643	0.226751	0.402046	0.267899	0.197276	0.081	0.114	1	27	0.018	0.06	0.608196	0.264925	0.155843	0.07	0.119892	0.0917899	0.279659	0.485924	0.98983	4.9391	0.110871	0.106463
Osceola	0.252789	0.344429	0.242069	242893	216796	4.3891	0.10759	0.225258	0.44561	0.312943	0.111074	0.083	0.128	2	31	0.009	0.105	0.693277	0.303898	0.235672	0.1	0.122568	0.0975538	0.481076	0.483923	0.47319	4.5536	0.113047	0.0893038
Palm Beach	0.243273	0.326174	0.134595	1156597	1102295	5.2432	0.158355	0.2291	0.368613	0.207103	0.166335	0.082	0.118	2	25	0.022	0.063	0.526942	0.21608	0.194643	0.05	0.0872058	0.107006	0.188599	0.477846	0.89416	5.5277	0.129197	0.0395609
Pasco	0.354892	0.32541	0.175499	400208	381006	4.3888	0.0430413	0.327286	0.305231	0.160908	0.0485398	0.082	0.121	2	31	0.014	0.131	0.634381	0.285606	0.31278	0.08	0.0902006	0.0871531	0.118758	0.47979	0.60894	4.601	0.11686	0.0589154
Pinellas	0.282849	0.268301	0.143721	798626	778364	4.5535	0.0912478	0.312094	0.363884	0.189815	0.0928219	0.073	0.105	1	24	0.027	0.055	0.618047	0.282714	0.256661	0.04	0.0933666	0.0772578	0.0772301	0.473181	0.98155	4.709	0.0929889	0.0905645
Polk	0.300548	0.303767	0.142884	509280	484747	4.3113	0.135852	0.27968	0.392668	0.232915	0.140441	0.096	0.126	3	26	0.015	0.068	0.668156	0.394319	0.241523	0.13	0.111385	0.135373	0.171693	0.483746	0.50589	4.4146	0.124114	0.115023
Putnam	0.345687	0.410953	0.158116	58316	59196	3.2497	0.142746	0.39214	0.423089	0.270473	0.149324	0.114	0.141	5	28	0.025	0.103	0.773208	0.41527	0.271418	0.13	0.175681	0.186256	0.0775602	0.47172	0.40123	3.3003	0.133601	0.125449
St. Johns	0.19917	0.246109	0.110319	176261	158350	6.4876	0.0503505	0.233692	0.290989	0.120872	0.0506011	0.06	0.078	2	27	0.02	0.056	0.582378	0.221571	0.183741	0.07	0.0676213	0.0439831	0.0574262	0.481216	0.99963	6.9523	0.0799294	0.073973
St. Lucie	0.265486	0.323011	0.150337	239335	226837	4.3413	0.172265	0.314418	0.379161	0.243563	0.180692	0.099	0.15	3	28	0.014	0.085	0.672499	0.305676	0.201822	0.13	0.116577	0.125092	0.156429	0.48174	0.38172	4.414	0.0895862	0.0532976
Santa Rosa	0.306794	0.301949	0.126201	131119	123307	5.7703	0.0593965	0.267798	0.34782	0.204645	0.0622412	0.071	0.11	3	28	0.007	0.078	0.697074	0.313204	0.264615	0.11	0.0822917	0.0853379	0.0460574	0.507825	0.75661	6.0652	0.0780628	0.0876917
Sarasota	0.286267	0.235506	0.113198	345829	331116	4.9052	0.0401883	0.31127	0.297388	0.199093	0.0405461	0.071	0.114	3	23	0.02	0.038	0.569149	0.20462	0.200473	0.07	0.067169	0.0679652	0.0726486	0.471884	0.79259	5.2796	0.0795263	0.0780029
Seminole	0.232894	0.223524	0.106186	358885	343426	5.8175	0.104777	0.222955	0.3037	0.213576	0.108742	0.08	0.107	2	27	0.012	0.063	0.622982	0.25796	0.214297	0.07	0.0886746	0.0467851	0.181217	0.476677	0.8299	5.8538	0.125451	0.0734555
Sumter	0.44135	0.246707	0.0802484	105987	91085	4.8493	0.0869298	0.356212	0.300955	0.136193	0.0787832	0.079	0.132	4	25	0.012	0.079	0.769355	0.346347	0.260197	0.04	0.0429109	0.129593	0.0487418	0.496754	0.37098	5.2594	0.0737541	0.121146
Suwannee	0.301824	0.34932	0.217697	35329	34531	3.5698	0.124873	0.301265	0.333398	0.269374	0.134875	0.103	0.117	6	26	0.019	0.073	0.714217	0.394163	0.26735	0.09	0.144867	0.191492	0.0731694	0.540825	0.13701	3.7796	0.0980785	0.0519426
Taylor	0.314513	0.443268	0.123544	18803	18778	3.6356	0.211737	0.363232	0.480425	0.186954	0.209966	0.077	0.132	6	22	0.012	0.078	0.662665	0.304181	0.226985	0.12	0.0959953	0.199614	0.0369622	0.573431	0.31567	3.6195	0.181941	0.134121
Union	0.360854	0.221782	0.115118	12653	12770	4.266	0.227643	0.340658	0.464405	0.176637	0.244922	0.105	0.096	6	23	0.024	0.058	0.830368	0.457308	0.251079	0.1	0.0776891	0.226376	0.053268	0.559495	0.19812	3.7778	0.14461	0.161778
Volusia	0.325275	0.330885	0.155881	430047	415608	4.2457	0.0950487	0.34051	0.3604	0.200451	0.0967987	0.078	0.112	3	25	0.021	0.079	0.665614	0.31482	0.274524	0.13	0.111916	0.0841992	0.109176	0.482873	0.74429	4.224	0.0901134	0.11279
Wakulla	0.152119	0.302014	0.164416	25592	24870	5.2691	0.15762	0.306763	0.340754	0.17192	0.161965	0.071	0.105	3	33	0.012	0.073	0.644646	0.326911	0.224637	0	0.0844795	0.101244	0.0364958	0.577789	0.31355	5.4078	0.113484	0.102073
Walton	0.225107	0.292578	0.259263	50228	46347	4.364	0.0534447	0.306819	0.350559	0.285468	0.0526001	0.073	0.099	4	28	0.007	0.102	0.554063	0.265294	0.197921	0.06	0.115235	0.137867	0.0512662	0.517599	0.51602	4.691	0.0865738	0.0770229
Washington	0.306577	0.37021	0.202252	20334	20107	3.8501	0.151639	0.359922	0.465705	0.212582	0.158355	0.098	0.135	6	31	0.005	0.145	0.740109	0.366374	0.225999	0.22	0.122553	0.169867	0.0295564	0.558318	0.20351	3.833	0.0883516	0.119215
